# Supplementary material for: Electrochemical switching of positronium triplet quenching
Source: Royal Society of Chemistry journal article supplement (doi:10.1039/d1cp03828a), 2021-01-01
Supplement: d1cp03828a1.pdf [file d1cp03828a1.pdf]

*Electronic Supplementary Information*

# Electrochemical Switching of Positronium Triplet Quenching

Philipp Brunner,<sup>\*a</sup> Eva-Maria Steyskal,<sup>a</sup> and  
Roland Würschum<sup>a</sup>

<sup>a</sup> *Institute of Materials Physics, Graz University of Technology, Petersgasse 16,  
8010 Graz, Austria, E-mail: philipp.brunner@tugraz.at*

# 1 Comparison of CVs

Fig. 1 shows the CV of 30 mmol/L  $K_3[Fe(CN)_6]$  with 1 mmol/L KOH measured in a sub-cell compared to that taken in a beaker. Both CVs are in good accordance; minor differences may arise from the different electrolyte volume<sup>1</sup>.

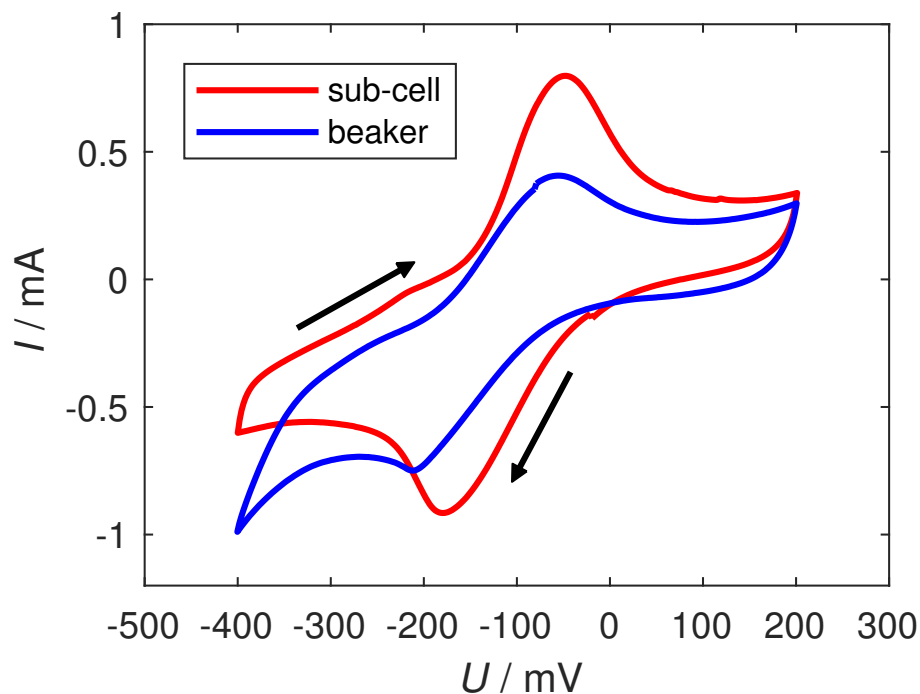

Figure 1 Cyclic voltammograms (CVs) of 30 mmol/L  $K_3[Fe(CN)_6]$  with 1 mmol/L KOH between  $-400$  and  $200$  mV with a scan rate of  $2 \text{ mVs}^{-1}$  in a sub-cell (red) and a beaker (blue). The arrows indicate the scan direction.

## 2 Static in-situ studies

A cutout of the measurement procedure for *static in-situ studies* as explained in the *main article* is given in Fig. 2. To avoid potential jumps, the potential was varied with a scan rate of  $2 \text{ mVs}^{-1}$  upon switching.

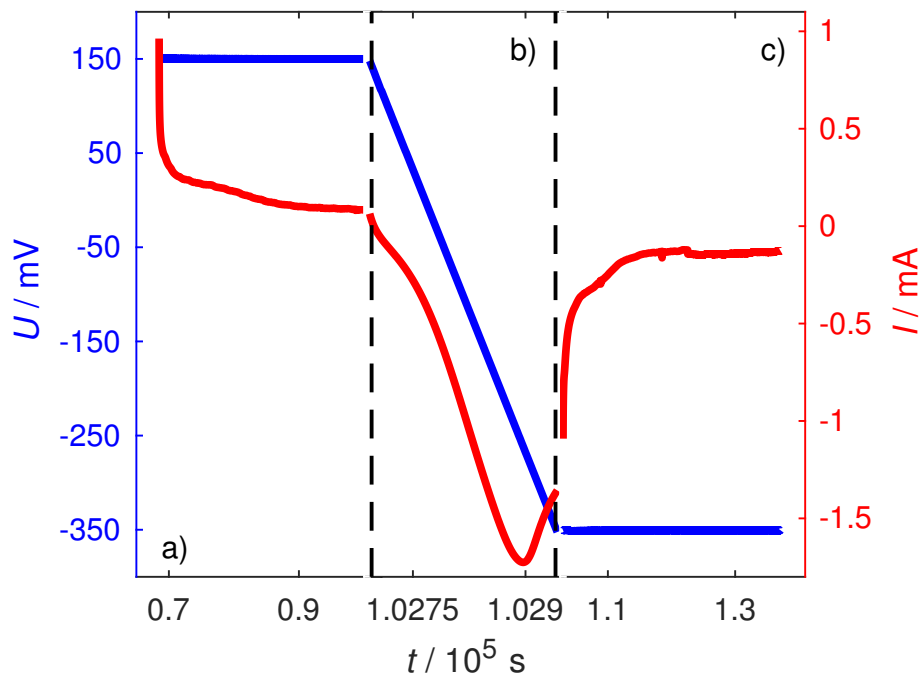

Figure 2 Cutout of the measurement sequence for *static in-situ switching*. At a potential of 150 mV (a) and  $-350 \text{ mV}$  (c), the current is measured over the time. b) After 9.5 h (end of a)) the potential is varied with a scan rate of  $2 \text{ mVs}^{-1}$  from 150 mV to  $-350 \text{ mV}$ . Note the different time scaling for the separated sections on the x-axes, the linear scan in b) takes only 250 s.

## Notes and references

- [1] W. C. Sim, N. Kutrakul, P. Khunkaewla and A. Schulte, *Sustain. Chem. Eng.*, 2020, **8**, 5082–5090.
